# Supplementary material for: Unveiling the microscopic origins and thermoelectric performance of full-Heusler compounds K2RbSb and Rb2KSb
Source: Royal Society of Chemistry journal article supplement (doi:10.1039/d4tc03859b), 2025-01-01
Supplement: d4tc03859b1.pdf [file d4tc03859b1.pdf]

# Supplementary material: Unveiling the Microscopic Origins and Thermoelectric Performance of full-Heusler compounds $K_2RbSb$ and $Rb_2KSb$

Peipei Liu,<sup>1</sup> Yinchang Zhao,<sup>1,\*</sup> Jun Ni,<sup>2,3</sup> and Zhenhong Dai<sup>1,†</sup>

<sup>1</sup>*Department of Physics, Yantai University,  
Yantai 264005, People's Republic of China*

<sup>2</sup>*State Key Laboratory of Low-Dimensional Quantum Physics,  
Department of Physics, Tsinghua University,  
Beijing 100084, People's Republic of China*

<sup>3</sup>*Frontier Science Center for Quantum Information,  
Beijing 100084, People's Republic of China*

(Dated: December 31, 2024)

PACS numbers: 65.40.-b, 66.70.-f, 63.20.-e, 72.20.-i

Keywords: full-Heusler compound, first-principles calculation, transport properties, thermoelectric properties

## A. Supplementary Calculation Detail.

### 1. Thermal Transport

In our calculations, the HA IFCs were captured using the finite displacement method. Specifically, we included all HA IFCs within the supercell and used a displacement distance of  $\Delta\mathbf{x}=0.01 \text{ \AA}$ . Additionally, non-harmonic IFCs were trained based on CSLD techniques. To obtain the displacement and force data sets required for nonharmonic (cubic and quartic) IFCs, we used 4000-step ab initio molecular dynamics (AIMD) simulations, capturing 80 Snapshots at 300 K with a time step of 2 fs. On this basis, we added a random displacement of  $0.1 \text{ \AA}$  to each atom of the 80 snapshots and obtained 80 quasirandom configurations, then derived anharmonic IFCs .

The group velocity of phonon mode  $\mathbf{qj}$  is given by

$$v_{\mathbf{qj}} = \frac{\partial w_{\mathbf{qj}}}{\partial \mathbf{q}} \quad (\text{S1})$$

The mode Grüneisen parameter, defined as

$$\gamma_{\mathbf{qj}} = -\frac{\partial \log w_{\mathbf{qj}}}{\partial \log V} \quad (\text{S2})$$

### 2. Electron Transport

For electron transport properties, five scattering mechanisms were considered, including ADP, POP, IMP, PIE, and MFP scattering. These were calculated from first-principles-derived material parameters. In particular, The differential scattering rate from state  $|n\mathbf{k}\rangle$  to state  $|m\mathbf{k} + \mathbf{q}\rangle$  is calculated using Fermi's golden rule as

$$\tilde{\tau}_{n\mathbf{k}\rightarrow m\mathbf{k}+\mathbf{q}}^{-1} = \frac{2\pi}{\hbar} |g_{nm}(\mathbf{k}, \mathbf{q})|^2 \delta(\varepsilon_{n\mathbf{k}} - \varepsilon_{m\mathbf{k}+\mathbf{q}}) \quad (\text{S3})$$

where  $\varepsilon_{n\mathbf{k}}$  is the energy of state  $|n\mathbf{k}\rangle$ , and  $g_{nm}(\mathbf{k}, \mathbf{q})$  is the matrix element for scattering from state  $|n\mathbf{k}\rangle$  into  $|m\mathbf{k} + \mathbf{q}\rangle$  state.

The acoustic deformation potential matrix element is given by

$$g_{nm}^{ADP}(\mathbf{k}, \mathbf{q}) = \sqrt{k_B T} \sum_{\mathbf{G} \neq -\mathbf{q}} \left[ \frac{\tilde{\mathbf{D}}_{nk} : \hat{\mathbf{S}}_l}{c_l \sqrt{\rho}} + \frac{\tilde{\mathbf{D}}_{nk} : \hat{\mathbf{S}}_{t_1}}{c_{t_1} \sqrt{\rho}} + \frac{\tilde{\mathbf{D}}_{nk} : \hat{\mathbf{S}}_{t_2}}{c_{t_2} \sqrt{\rho}} \right] \langle m\mathbf{k} + \mathbf{q} | e^{i(\mathbf{q}+\mathbf{G})\cdot\mathbf{r}} | n\mathbf{k} \rangle \quad (\text{S4})$$

where  $\tilde{\mathbf{D}}_{nk} = \mathbf{D}_{nk} + \mathbf{v}_{nk} \otimes \mathbf{v}_{nk}$  in which  $\mathbf{D}_{nk}$  is the rank 2 deformation potential tensor,  $\hat{\mathbf{S}} = \hat{\mathbf{q}} \otimes \hat{\mathbf{u}}$  is the unit strain associated with an acoustic mode,  $\mathbf{u}$  is the unit vector of phonon polarization, and the subscripts  $l$ ,  $t_1$  and  $t_2$  indicate properties belonging to the longitudinal and transverse modes.

The piezoelectric differential scattering rate is given by

$$g_{nm}^{PIE}(\mathbf{k}, \mathbf{q}) = \sqrt{k_B T} \sum_{\mathbf{G} \neq -\mathbf{q}} \left[ \frac{\hat{\mathbf{n}}\mathbf{h} : \hat{\mathbf{S}}_l}{c_l \sqrt{\rho}} + \frac{\hat{\mathbf{n}}\mathbf{h} : \hat{\mathbf{S}}_{t_1}}{c_{t_1} \sqrt{\rho}} + \frac{\hat{\mathbf{n}}\mathbf{h} : \hat{\mathbf{S}}_{t_2}}{c_{t_2} \sqrt{\rho}} \right] \frac{\langle m\mathbf{k} + \mathbf{q} | e^{i(\mathbf{q}+\mathbf{G})\cdot\mathbf{r}} | n\mathbf{k} \rangle}{|\mathbf{q} + \mathbf{G}|} \quad (\text{S5})$$

where  $\mathbf{h}$  is the full piezoelectric stress tensor and  $\hat{\mathbf{n}} = (\mathbf{q} + \mathbf{G})/|\mathbf{q} + \mathbf{G}|$  is a unit vector in the direction of scattering.

The polar optical phonon differential scattering rate is given by

$$g_{nm}^{POP}(\mathbf{k}, \mathbf{q}) = \left[ \frac{\hbar\omega_{po}}{2} \right]^{1/2} \sum_{\mathbf{G} \neq -\mathbf{q}} \left( \frac{1}{\hat{\mathbf{n}} \cdot \epsilon_\infty \cdot \hat{\mathbf{n}}} - \frac{1}{\hat{\mathbf{n}} \cdot \epsilon_s \cdot \hat{\mathbf{n}}} \right) \frac{\langle m\mathbf{k} + \mathbf{q} | e^{i(\mathbf{q}+\mathbf{G})\cdot\mathbf{r}} | n\mathbf{k} \rangle}{|\mathbf{q} + \mathbf{G}|} \quad (\text{S6})$$

where  $\epsilon_s$  and  $\epsilon_\infty$  are the static and high-frequency dielectric tensors and  $\omega_{po}$  is the polar optical phonon frequency. To capture scattering from the full phonon band structure in a single phonon frequency, each phonon mode is weighted by the dipole moment it produces.

The ionized impurity matrix element is given by

$$g_{nm}^{IMP}(\mathbf{k}, \mathbf{q}) = \sum_{\mathbf{G} \neq -\mathbf{q}} \frac{n_{imp}^{1/2} Z e}{\hat{\mathbf{n}} \cdot \epsilon_s \cdot \hat{\mathbf{n}}} \frac{\langle m\mathbf{k} + \mathbf{q} | e^{i(\mathbf{q}+\mathbf{G})\cdot\mathbf{r}} | n\mathbf{k} \rangle}{|\mathbf{q} + \mathbf{G}|^2 + \beta^2} \quad (\text{S7})$$

where  $Z$  is the charge state of the impurity center,  $n_{imp}$  is the concentration of ionized impurities (i.e.,  $C \times (n_{holes} - n_{electrons})/Z$  where  $C$  is the amount of charge compensation), and  $\beta$  is the inverse screening length, defined as

$$\beta^2 = \frac{e^2}{\epsilon_s \kappa_B T} \int \frac{d\varepsilon}{V} D(\varepsilon) f(1-f) \quad (\text{S8})$$

where  $V$  is the unit cell volume,  $D$  is the density of states, and  $f$  is the Fermi–Dirac distribution given in the transport properties section.

The effective phonon frequency is determined from the phonon frequencies  $\omega_{\mathbf{q}\nu}$  (where  $\nu$  is a phonon branch and  $\mathbf{q}$  is a phonon wave vector) and eigenvectors  $\mathbf{e}_{\kappa\nu}(\mathbf{q})$  (where  $\kappa$  is an

atom in the unit cell). In order to capture scattering from the full phonon band structure in a single phonon frequency, each phonon mode is weighted by the dipole moment it produces according to

$$\omega_\nu = \sum_{\kappa} \left[ \frac{1}{M_{\kappa} \omega_{q\nu}} \right]^{1/2} \times [\mathbf{q} \cdot \mathbf{Z}_{\kappa}^* \cdot \mathbf{e}_{\kappa\nu}(\mathbf{q})] \quad (\text{S9})$$

where  $\mathbf{Z}_{\kappa}^*$  is the Born effective charge. This naturally suppresses the contributions from transverse-optical and acoustic modes in the same manner as the more general formalism for computing Frölich based electron-phonon coupling.

The weight is calculated only for  $\Gamma$ -point phonon frequencies and averaged over the full unit sphere to capture both the polar divergence at  $\mathbf{q} \rightarrow 0$  and any anisotropy in the dipole moments. The effective phonon frequency is calculated as the weighted sum over all  $\Gamma$ -point phonon modes according to

$$\omega_{po} = \frac{\omega_{\Gamma\nu} w_\nu}{\sum_{\nu} w_\nu} \quad (\text{S10})$$

Finally, we solve for the electronic BTE using the band gap value calculated by the HSE06 function as input. The following is a representation of the electron transport parameters tensor Seebeck coefficient( $S$ ), electrical conductivity( $\sigma$ ), and electronic thermal conductivity( $\kappa_e$ )

$$S^{\alpha\beta} = \frac{\int \Sigma_{\alpha\beta}(\varepsilon)(\varepsilon - \varepsilon_F) \left[ -\frac{\partial f^0}{\partial \varepsilon} \right] d\varepsilon}{eT \int \Sigma_{\alpha\beta}(\varepsilon) \left[ -\frac{\partial f^0}{\partial \varepsilon} \right] d\varepsilon} \quad (\text{S11})$$

$$\sigma^{\alpha\beta} = e^2 \int \Sigma_{\alpha\beta}(\varepsilon) \left[ -\frac{\partial f^0}{\partial \varepsilon} \right] d\varepsilon \quad (\text{S12})$$

$$\kappa_e^{\alpha\beta} = \left\{ \frac{(\int \Sigma_{\alpha\beta}(\varepsilon)(\varepsilon - \varepsilon_F) \left[ -\frac{\partial f^0}{\partial \varepsilon} \right])^2 d\varepsilon}{T \int \Sigma_{\alpha\beta}(\varepsilon) \left[ -\frac{\partial f^0}{\partial \varepsilon} \right] d\varepsilon} - \frac{1}{T} \int \Sigma_{\alpha\beta}(\varepsilon)(\varepsilon - \varepsilon_F)^2 \left[ \frac{\partial f^0}{\partial \varepsilon} \right] d\varepsilon \right\} \quad (\text{S13})$$

Among them,  $e$ ,  $T$ ,  $\varepsilon_F$ ,  $\Sigma_{\alpha\beta}(\varepsilon)$  and  $f^0$  are the electron charge, absolute temperature, certain doped Fermi level, spectral conductivity and Fermi-Dirac distribution function respectively. Spectral conductivity is defined as

$$\Sigma_{\alpha\beta}(\varepsilon) = \sum_n \int \frac{d\mathbf{k}}{8\pi^3} v_{n\mathbf{k}}^\alpha v_{n\mathbf{k}}^\beta \tau_{n\mathbf{k}} \delta(\varepsilon - \varepsilon_{n\mathbf{k}}) \quad (\text{S14})$$

in which,  $n$  is the electron band index,  $\mathbf{k}$  stands the wave vector,  $\alpha$  and  $\beta$  represent Cartesian coordinates,  $v_{n\mathbf{k}}$  is the energy,  $v_{n\mathbf{k}}^{\alpha(\beta)}$  denote the electron group velocity.

We give the deformation potential of these two materials calculated using AMSET software as follows:

(1) The Valence band maximum of  $K_2RbSb$

band: 29-30

$$\text{k-point: } \begin{bmatrix} 0.00 & 0.00 & 0.00 \end{bmatrix}; \text{ deformation potential: } \begin{bmatrix} 1.81 & 1.31 & 1.31 \\ 1.31 & 1.81 & 1.31 \\ 1.31 & 1.31 & 1.81 \end{bmatrix}$$

band: 31-32

$$\text{k-point: } \begin{bmatrix} 0.00 & 0.00 & 0.00 \end{bmatrix}; \text{ deformation potential: } \begin{bmatrix} 1.80 & 1.37 & 1.37 \\ 1.37 & 1.80 & 1.37 \\ 1.37 & 1.37 & 1.80 \end{bmatrix}$$

(2) The Conduction band minimum of  $K_2RbSb$

band: 33-34

$$\text{k-point: } \begin{bmatrix} 0.00 & 0.00 & 0.00 \end{bmatrix}; \text{ deformation potential: } \begin{bmatrix} 2.01 & 0.03 & 0.03 \\ 0.03 & 2.01 & 0.03 \\ 0.03 & 0.03 & 2.01 \end{bmatrix}$$

(3) The Valence band maximum of  $Rb_2KSb$

band: 31-32

$$\text{k-point: } \begin{bmatrix} 0.00 & 0.50 & 0.50 \end{bmatrix}; \text{ deformation potential: } \begin{bmatrix} 1.90 & 0.00 & 0.00 \\ 0.00 & 0.50 & 0.14 \\ 0.00 & 0.14 & 0.50 \end{bmatrix}$$

(4) The Conduction band minimum of  $Rb_2KSb$

band: 33-34

$$\text{k-point: } \begin{bmatrix} 0.00 & 0.00 & 0.00 \end{bmatrix}; \text{ deformation potential: } \begin{bmatrix} 1.45 & 0.02 & 0.02 \\ 0.02 & 1.45 & 0.02 \\ 0.02 & 0.02 & 1.45 \end{bmatrix}$$

## B. Supplementary Figures and Tables.

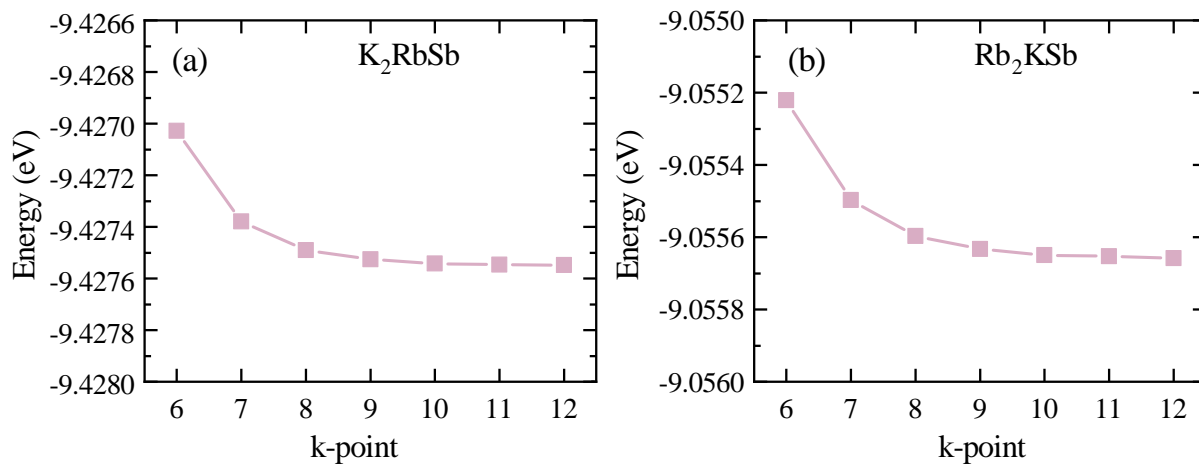

**Fig. S1.** (Color online). The k-point convergence test for (a)  $K_2RbSb$  and (b)  $Rb_2KSb$ .

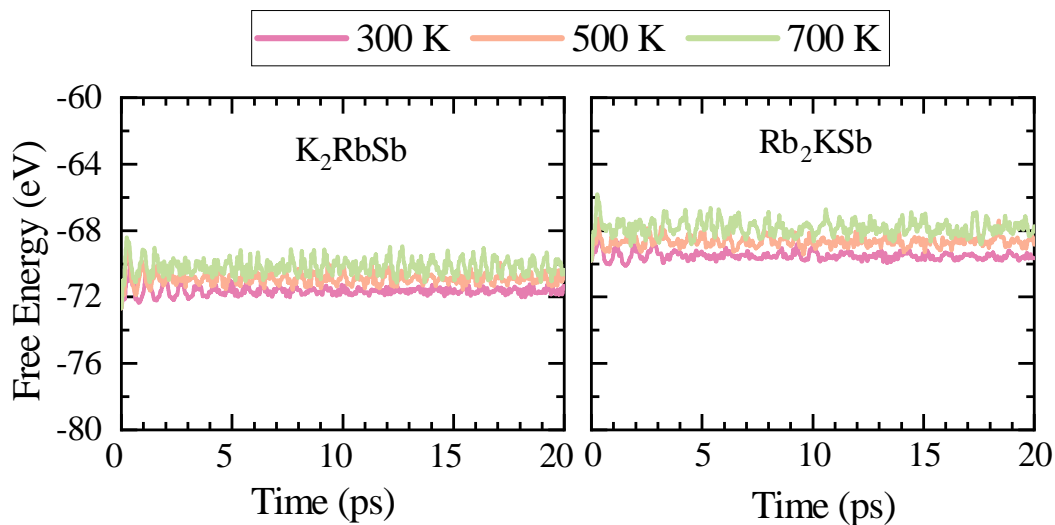

**Fig. S2.** (Color online). The AIMD simulations for (a)  $K_2RbSb$  and (b)  $Rb_2KSb$ .

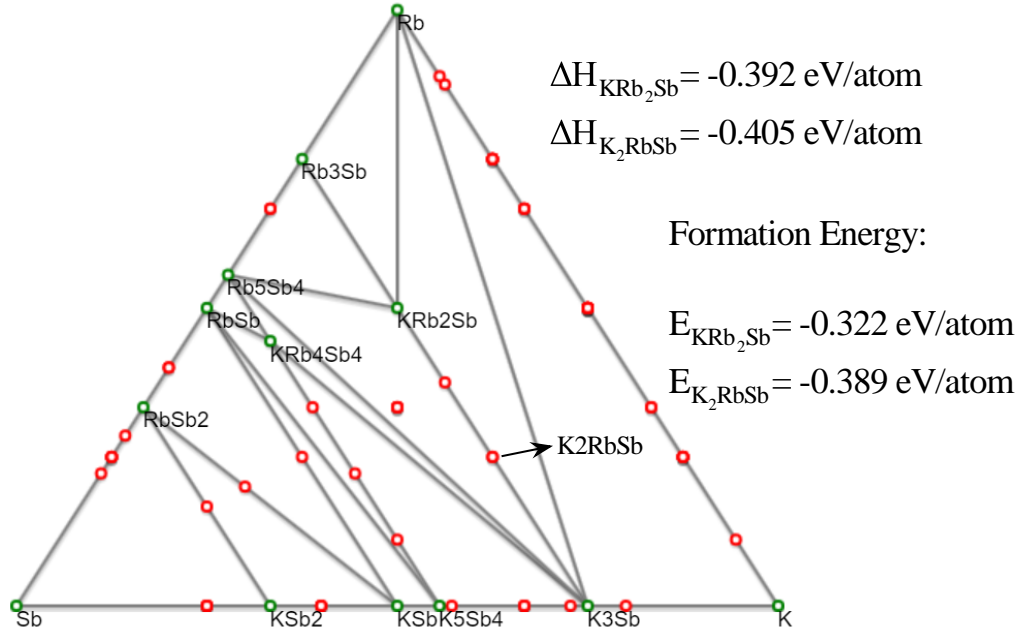

**Fig. S3.** (Color online). The phase diagram of K-Rb-Sb from the Open Quantum Materials Database (OQMD).

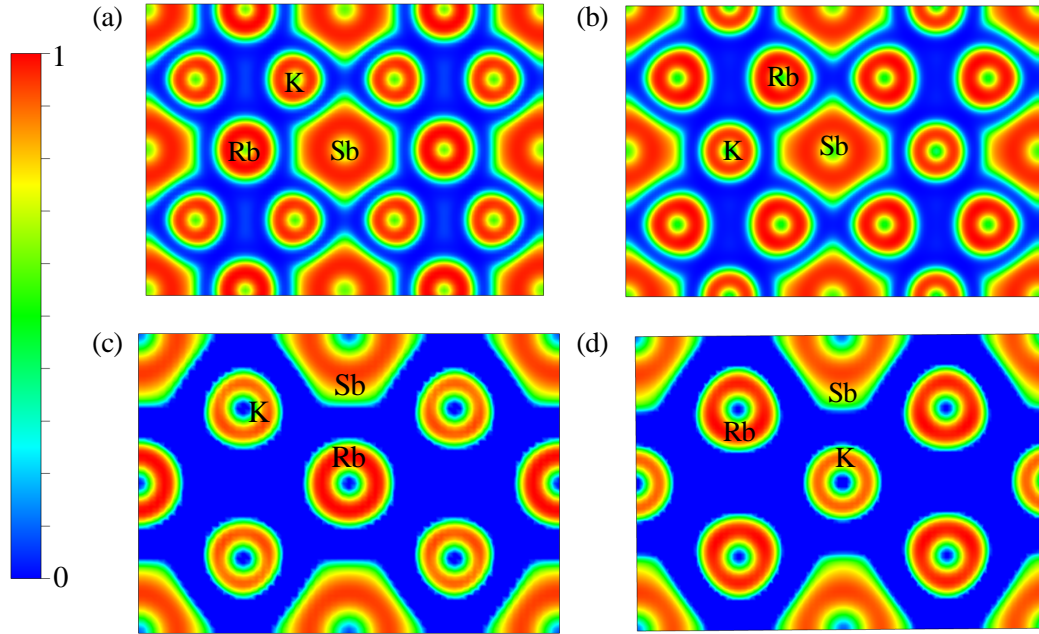

**Fig. S4.** (Color online). The 2D projected electron localization function (ELF) in (110) plane for (a)  $\text{K}_2\text{RbSb}$  and (b)  $\text{Rb}_2\text{KSb}$ . The (011) plane of (c)  $\text{K}_2\text{RbSb}$  and (d)  $\text{Rb}_2\text{KSb}$ , the distances from the origin are 6.01 Å and 6.10 Å

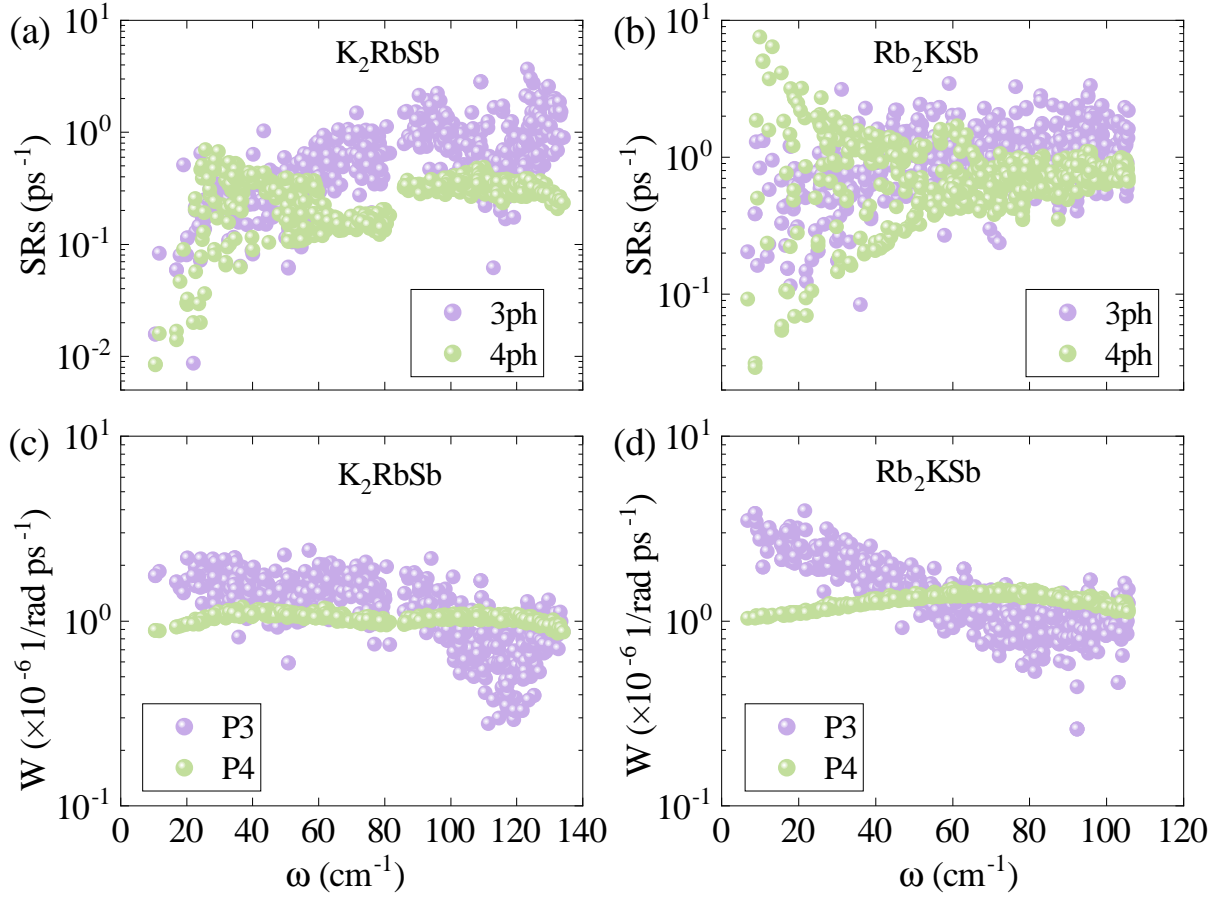

**Fig. S5.** (Color online). The scattering rate (SRs) and scattering phase space of 3ph and 4ph were calculated by SCP approximation at 300 K for  $\text{K}_2\text{RbSb}$  and  $\text{Rb}_2\text{KSb}$ .



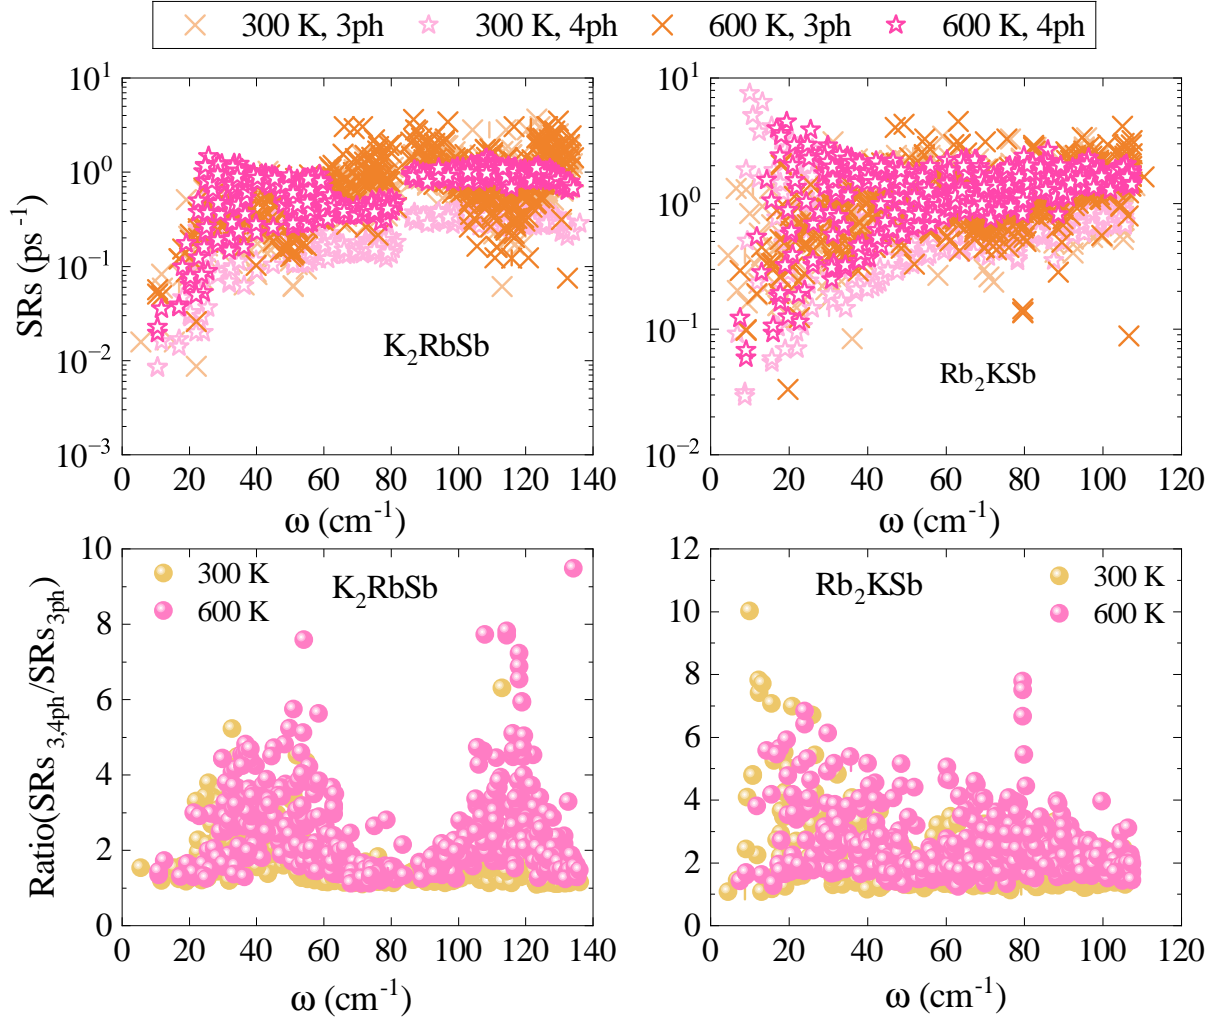

**Fig. S6.** (Color online). The scattering rate (SRs) of 3ph, 4ph and the ratio of SRs at 300 K and 600 K for  $\text{K}_2\text{RbSb}$  and  $\text{Rb}_2\text{KSb}$ .

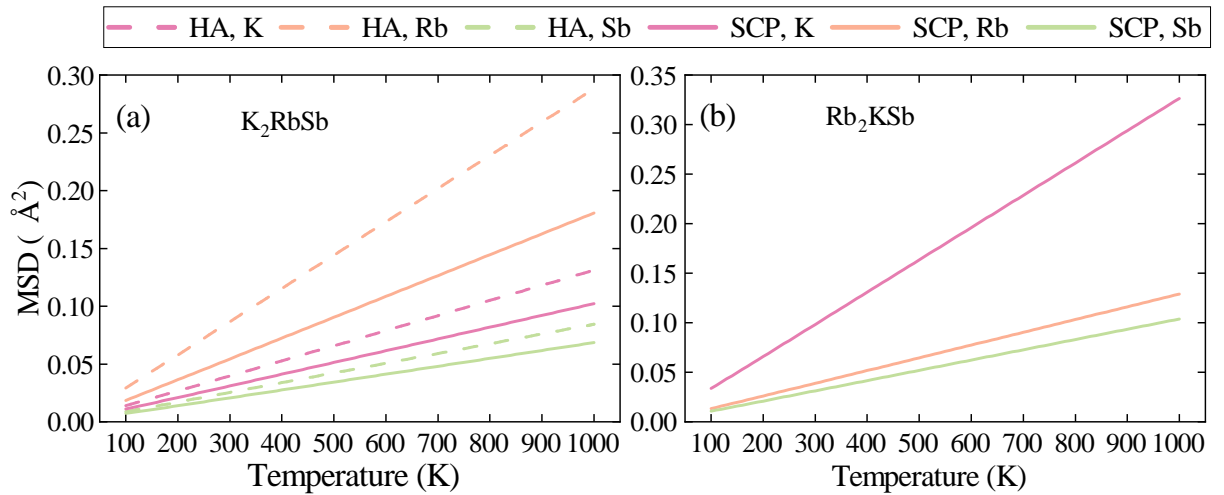

**Fig. S7.** (Color online). The temperature dependent atomic mean square displacements (MSD) of (a)  $\text{K}_2\text{RbSb}$ , and (b)  $\text{Rb}_2\text{KSb}$  were calculated by HA and SCP method.

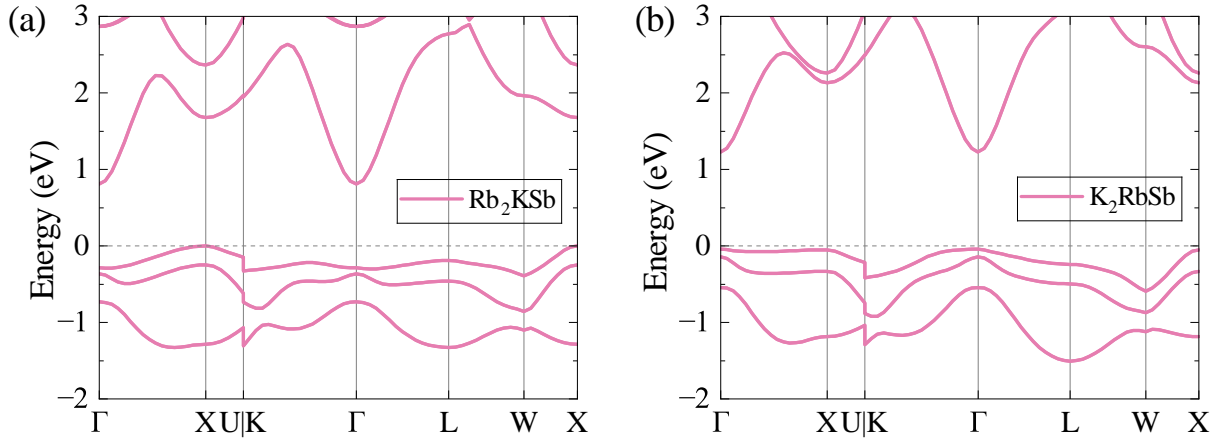

**Fig. S8.** (Color online). The electron band structure using HSE06 method with SOC for (a)  $\text{K}_2\text{RbSb}$  and (b)  $\text{Rb}_2\text{KSb}$ .

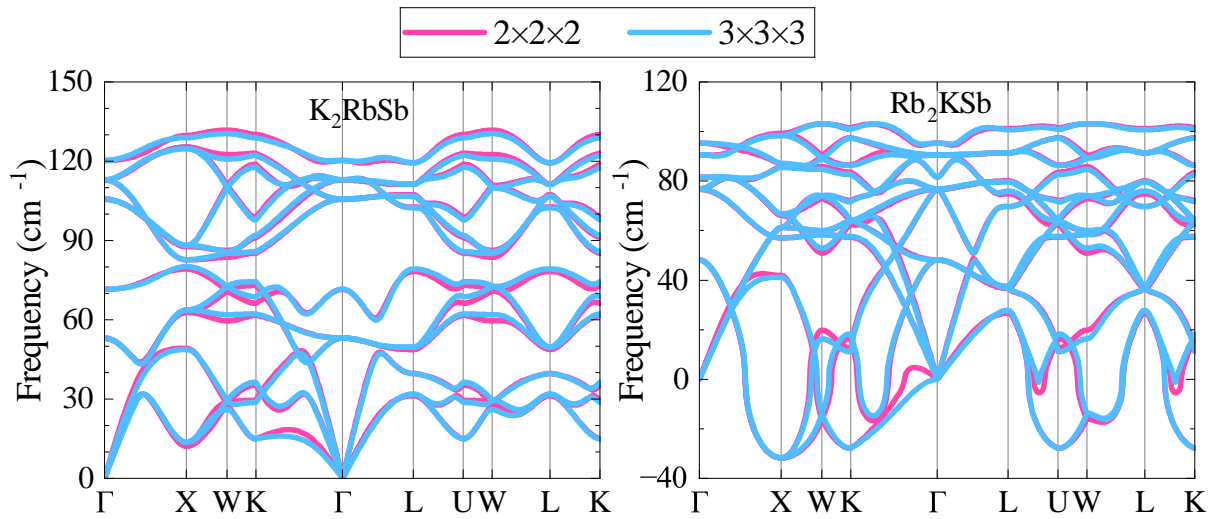

**Fig. S9.** (Color online). The comparison of harmonic phonon dispersion between different supercells of  $\text{K}_2\text{RbSb}$  and  $\text{Rb}_2\text{KSb}$ .

TABLE S1. Born Effective Charge ( $Z^*$ )

|                     | K      | Rb     | Sb      |
|---------------------|--------|--------|---------|
| RbK <sub>2</sub> Sb | 0.8558 | 1.2121 | -2.9236 |
| Rb <sub>2</sub> KSb | 1.3955 | 0.7461 | -2.8878 |

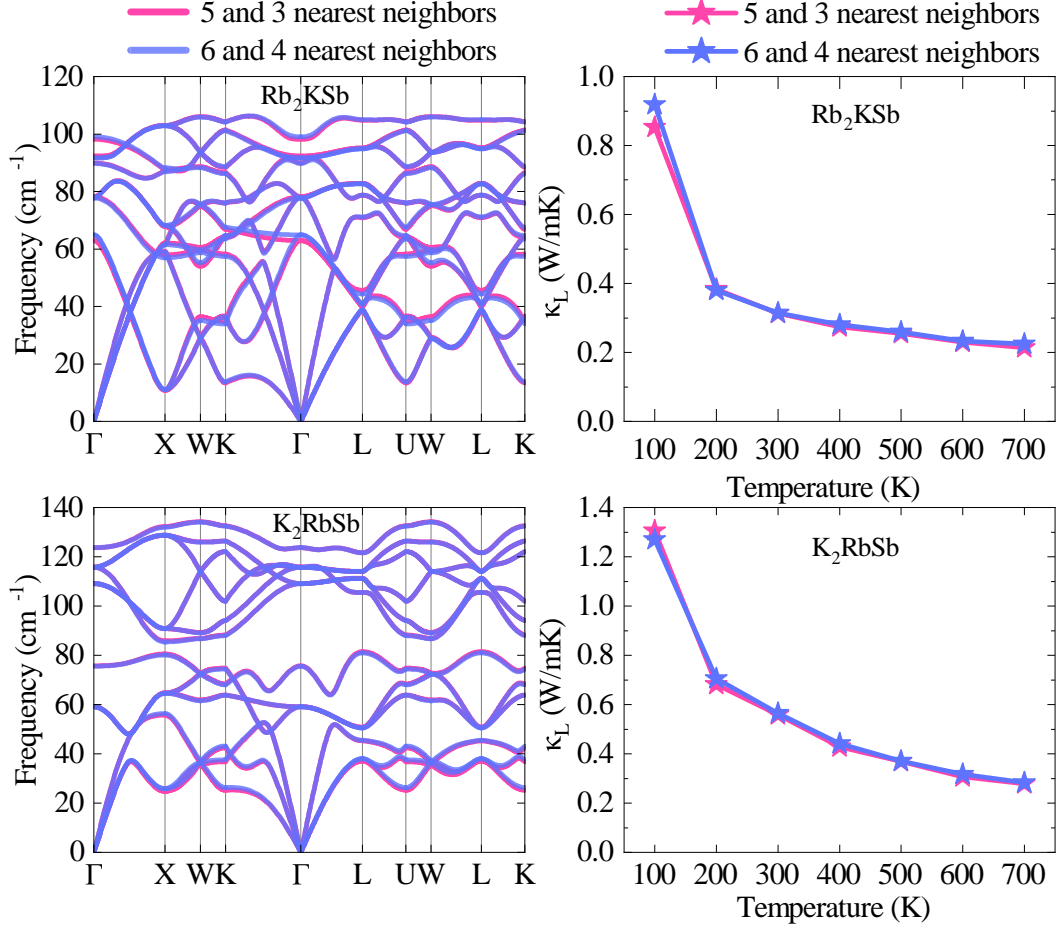

**Fig. S10.** (Color online). The phonon spectra at 300 K and lattice thermal conductivity of Rb<sub>2</sub>KSb and K<sub>2</sub>RbSb obtained based on the high-order force constants extracted at different cutoff radius.

\* y.zhao@ytu.edu.cn

† zhdai@ytu.edu.cn

TABLE S2. The lattice thermal conductivity and its coherent term.

| material | RbK <sub>2</sub> Sb   |            |                                          | Rb <sub>2</sub> KSb   |            |                                          |
|----------|-----------------------|------------|------------------------------------------|-----------------------|------------|------------------------------------------|
| T        | $\kappa_L^{coherent}$ | $\kappa_L$ | $\kappa_L^{coherent} / \kappa_L^{Total}$ | $\kappa_L^{coherent}$ | $\kappa_L$ | $\kappa_L^{coherent} / \kappa_L^{Total}$ |
| 100 K    | 0.0060                | 1.3057     | 0.0045                                   | 0.1177                | 0.8528     | 0.1213                                   |
| 200 K    | 0.0103                | 0.6809     | 0.0149                                   | 0.0516                | 0.3823     | 0.1189                                   |
| 300 K    | 0.0131                | 0.5592     | 0.0228                                   | 0.0480                | 0.3129     | 0.1330                                   |
| 400 K    | 0.0145                | 0.4287     | 0.0327                                   | 0.0418                | 0.2744     | 0.1322                                   |
| 500 K    | 0.0158                | 0.3696     | 0.0409                                   | 0.0389                | 0.2548     | 0.1324                                   |
| 600 K    | 0.0166                | 0.3072     | 0.0512                                   | 0.0379                | 0.2299     | 0.1415                                   |

 TABLE S3. The band effective masses ( $m^*$ ).

| material      | RbK <sub>2</sub> Sb    |                        |                        | Rb <sub>2</sub> KSb    |                   |                        |                        |
|---------------|------------------------|------------------------|------------------------|------------------------|-------------------|------------------------|------------------------|
| K-Path        | $\Gamma \rightarrow K$ | $\Gamma \rightarrow L$ | $\Gamma \rightarrow X$ | $X \rightarrow \Gamma$ | $X \rightarrow U$ | $\Gamma \rightarrow K$ | $\Gamma \rightarrow L$ |
| Hole(VBM)     | -9.313 $m_0$           | -2.475 $m_0$           | -13.489 $m_0$          | -3.929 $m_0$           | -3.333 $m_0$      |                        |                        |
| Electron(CBM) | 0.182 $m_0$            | 0.178 $m_0$            | 0.192 $m_0$            |                        |                   | 0.179 $m_0$            | 0.178 $m_0$            |
